# Supplementary material for: An efficient palladium catalyst on bentonite for Suzuki–Miyaura reaction at room temperature
Source: Royal Society of Chemistry journal article supplement (doi:10.1039/c3gc41469h), 2013-01-01

## Supporting information

# **An Efficient Palladium Catalyst on Bentonite for Suzuki-Miyaura Reaction at Room Temperature**

Guodong Ding, Weitao Wang, Tao Jiang\*, Buxing Han\*

*Beijing National Laboratory for Molecular Sciences (BNLMS), Centre for Molecular Science, Institute of Chemistry, Chinese Academy of Sciences, Beijing 100190, China*

Tel./fax: +86 10 62562821. E-mail addresses: [Jiangt@iccas.ac.cn](mailto:Jiangt@iccas.ac.cn) (Tao Jiang); [Hanbx@iccas.ac.cn](mailto:Hanbx@iccas.ac.cn) (Buxing Han).

The  $^1\text{H}$  NMR and  $^{13}\text{C}$  NMR spectra were recorded on a Bruker Avance III 400 HD spectrometer in  $\text{CDCl}_3$  with TMS as an internal standard. Chemical shifts for protons are referenced to tetramethylsilane (TMS,  $^1\text{H}$  NMR: 0.00 ppm), Chemical shifts for carbons are referenced to the residual solvent peaks ( $\text{CDCl}_3$ ,  $^{13}\text{C}$  NMR: 77.16 ppm).

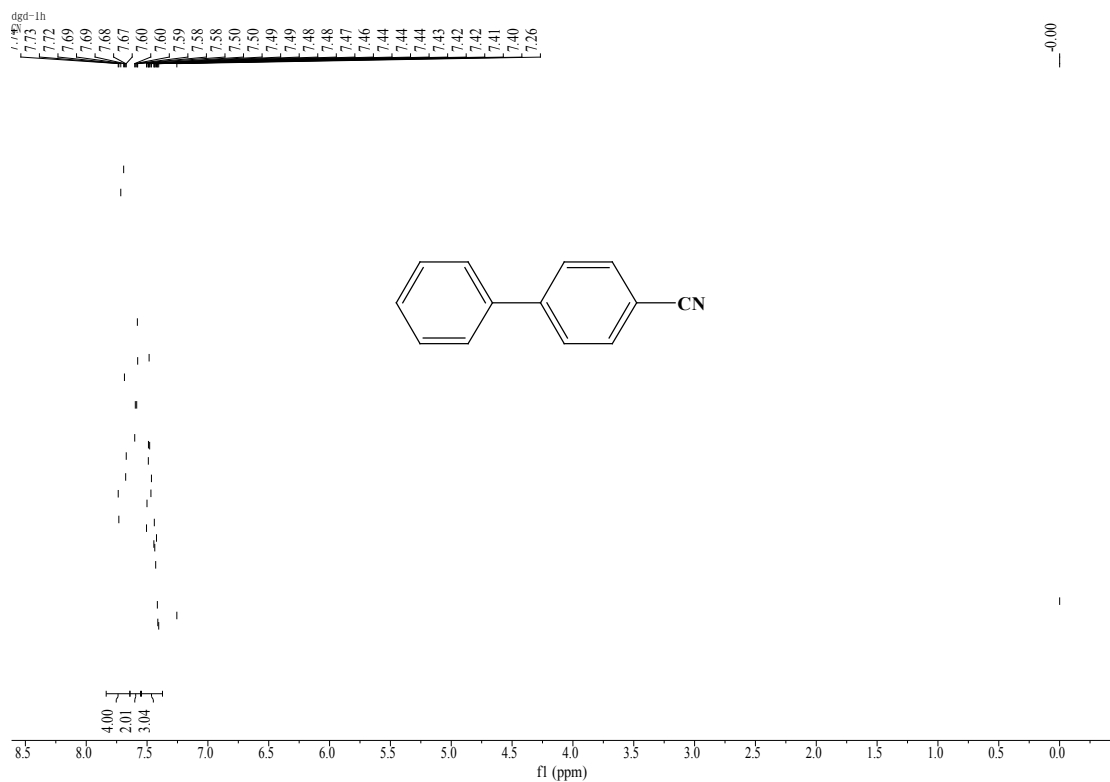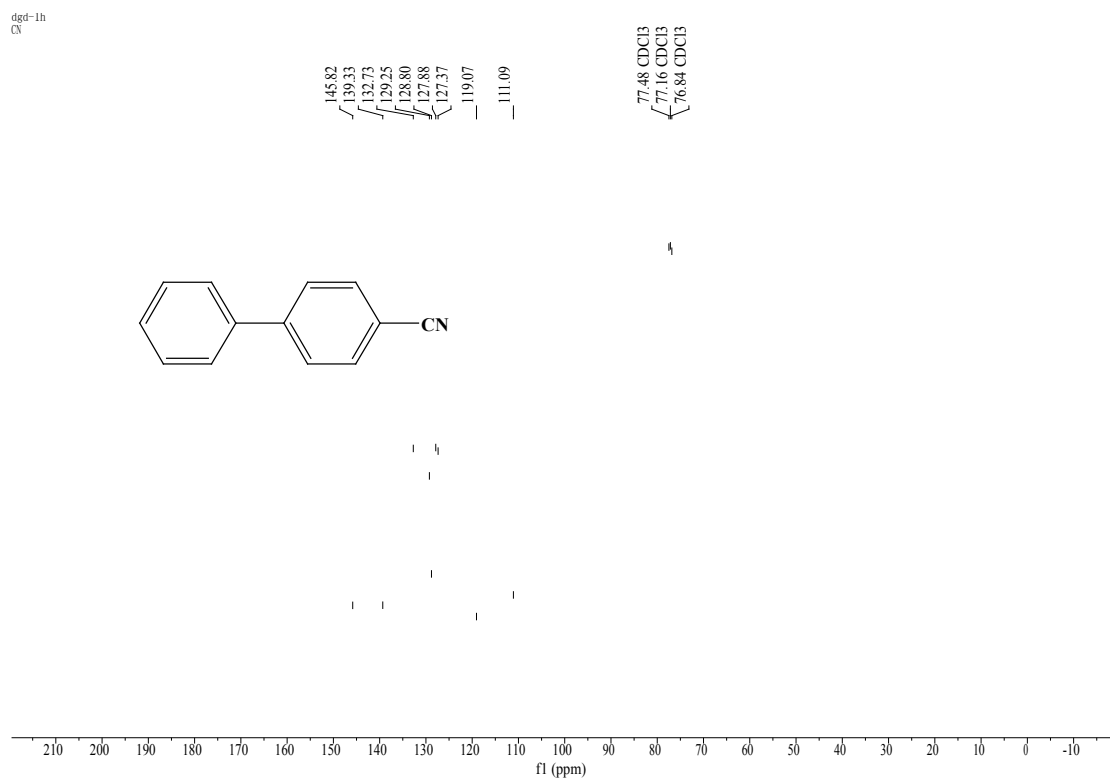

dgd-1h/667

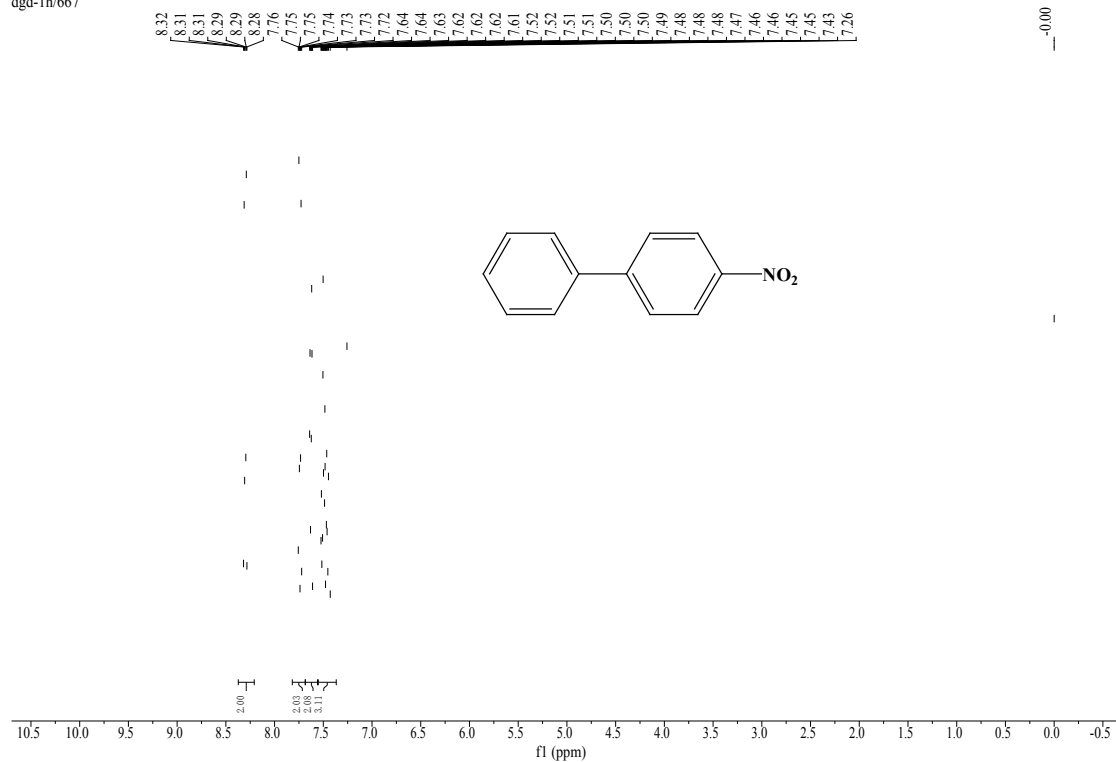

dgd-1h  
DCD-N02

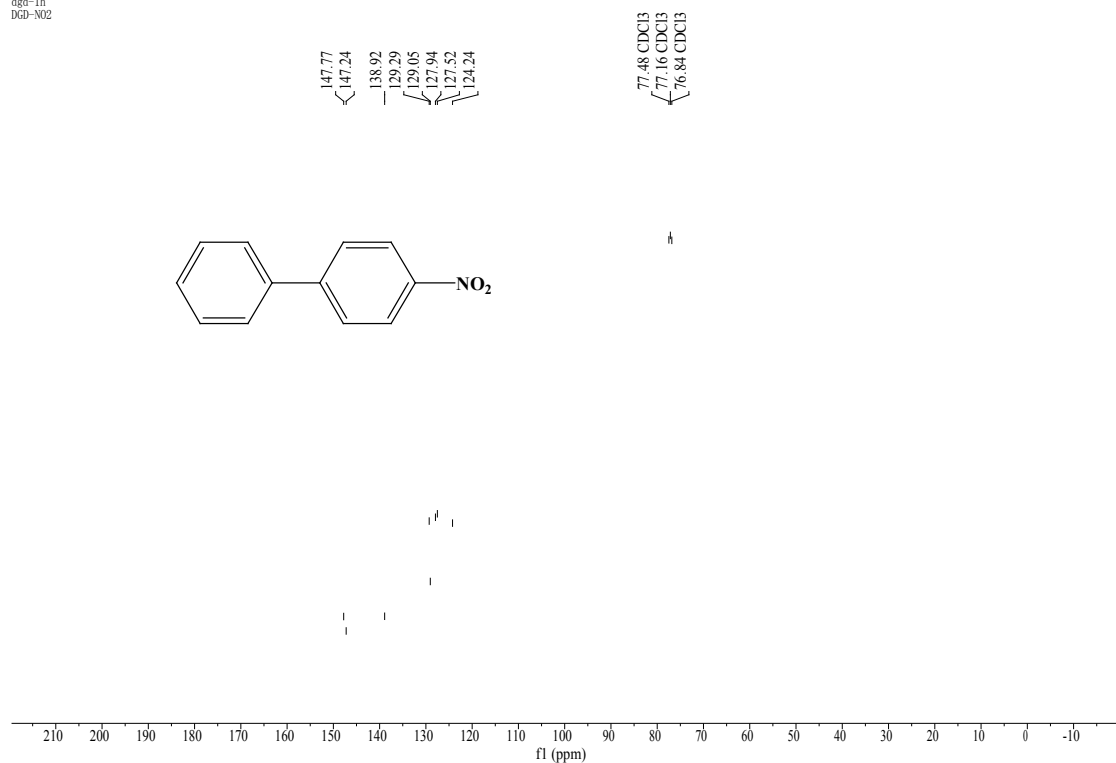

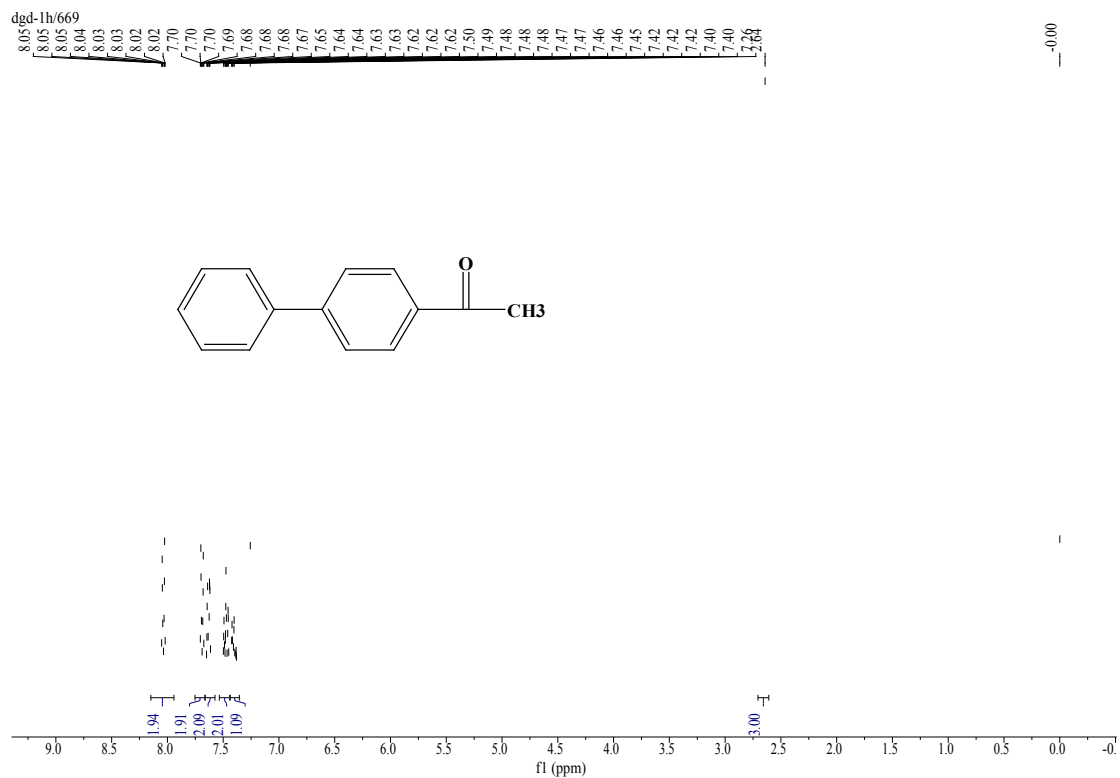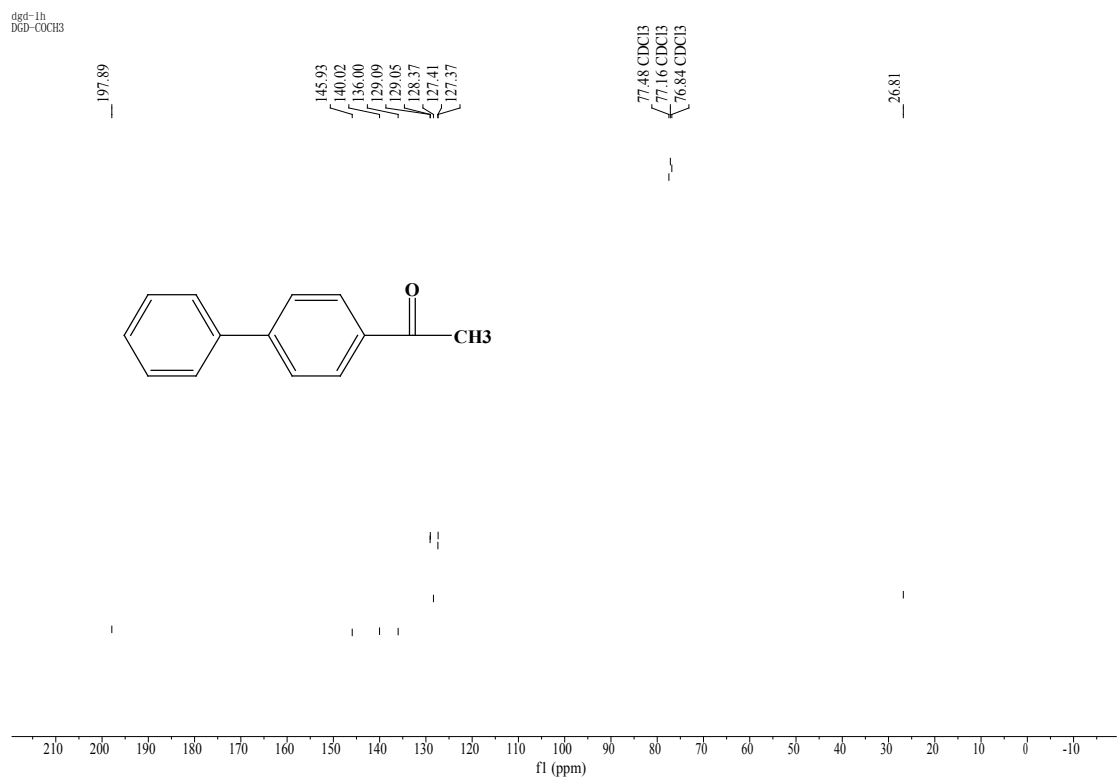

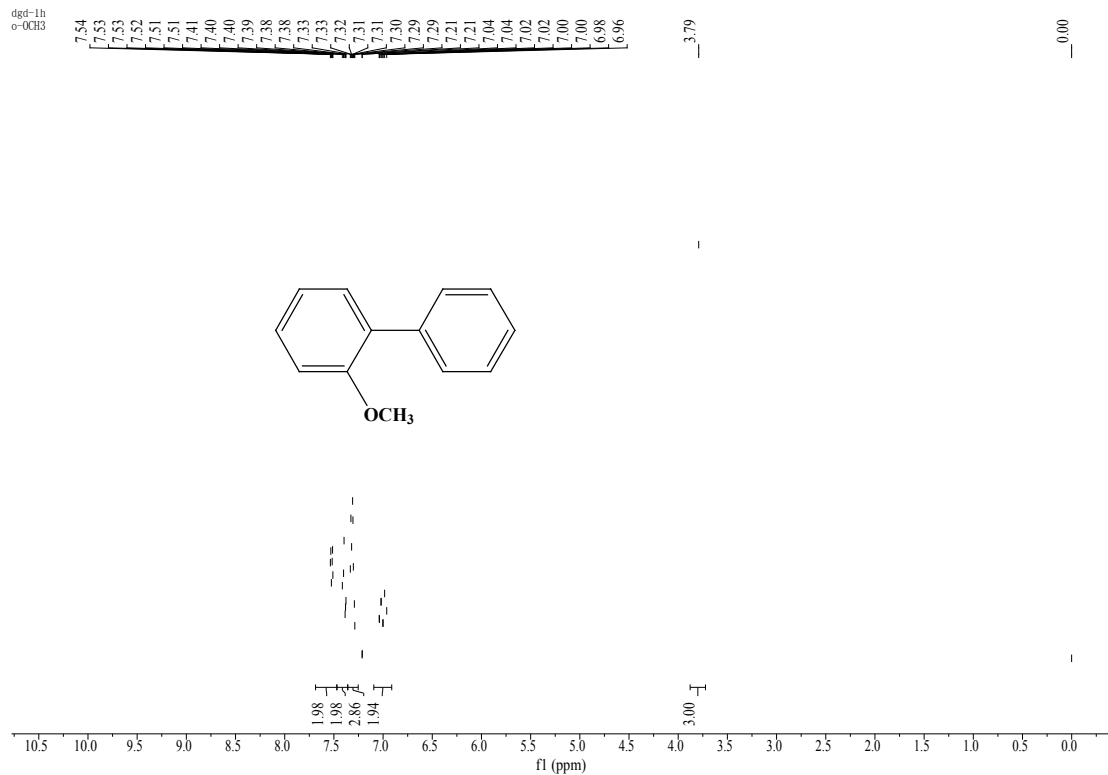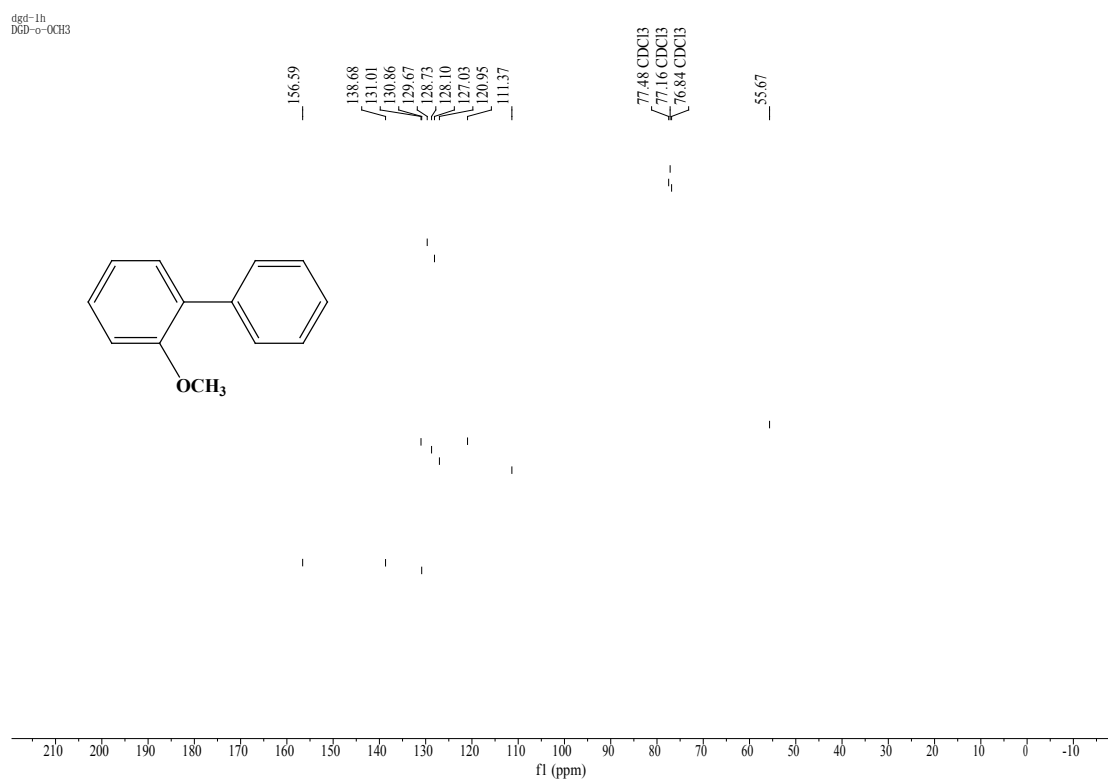

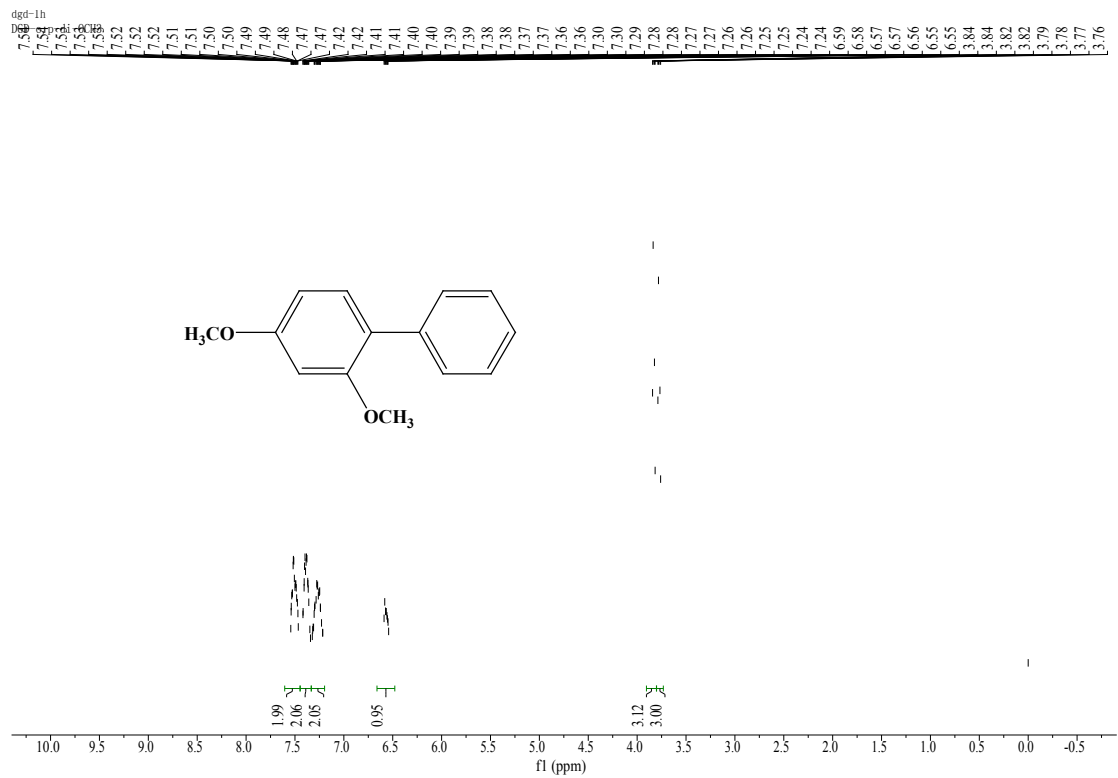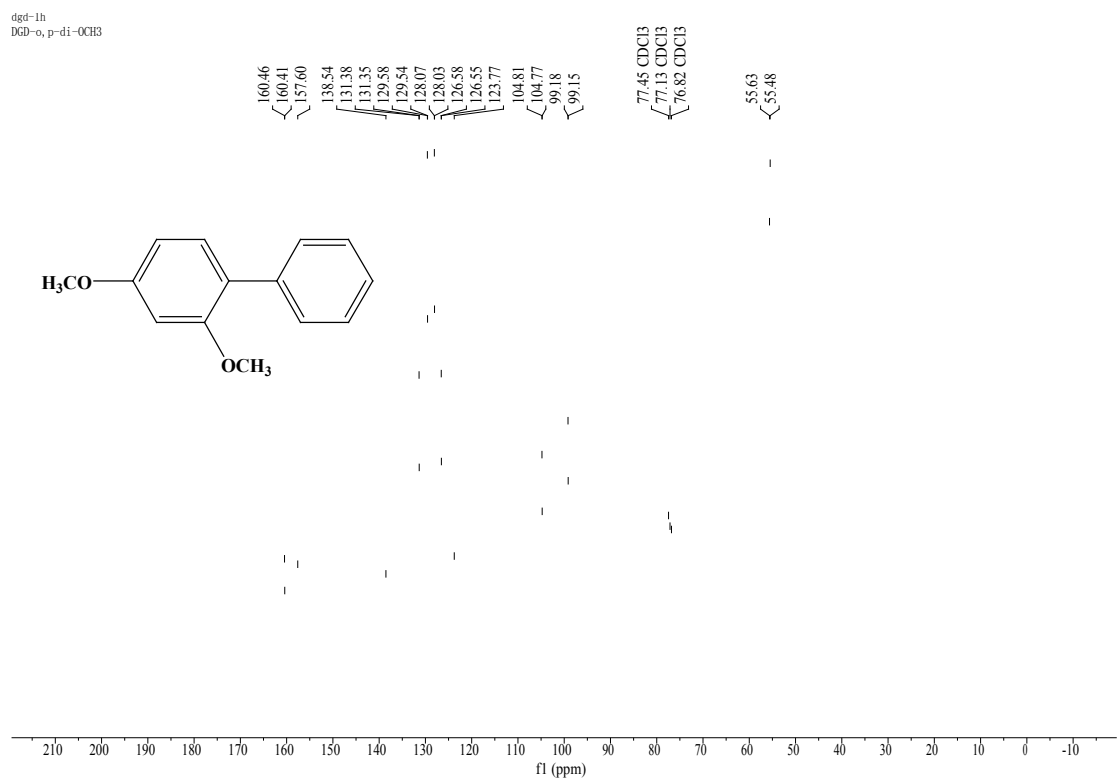

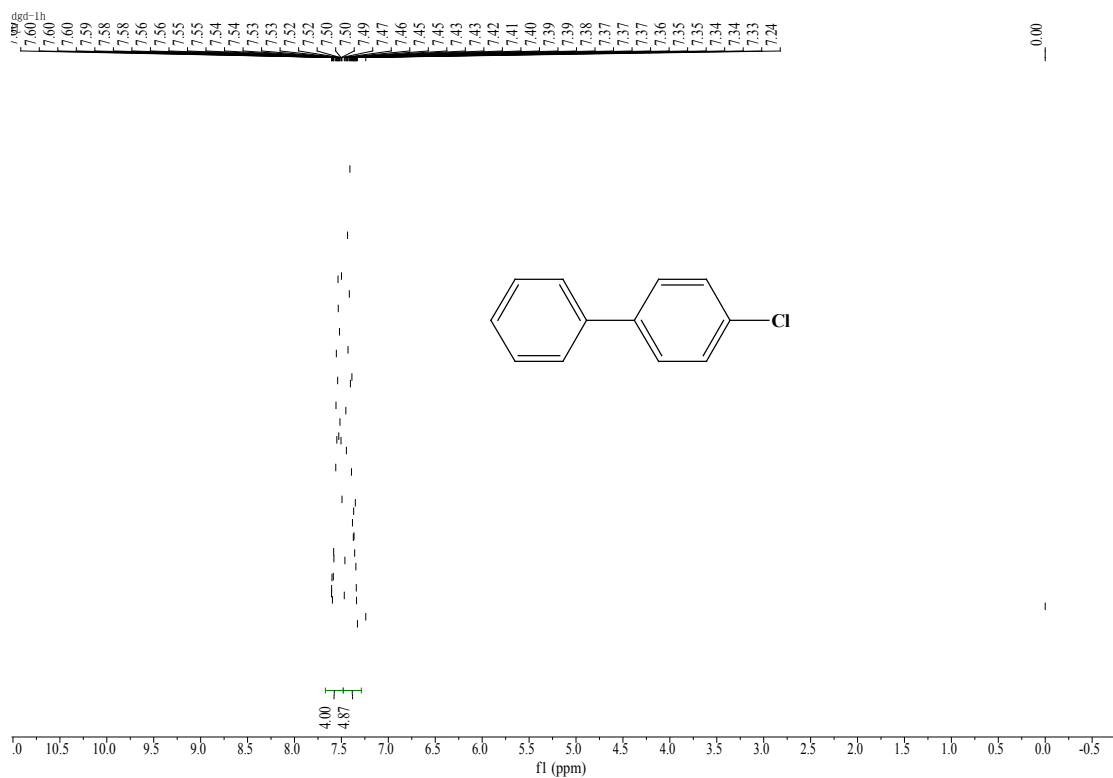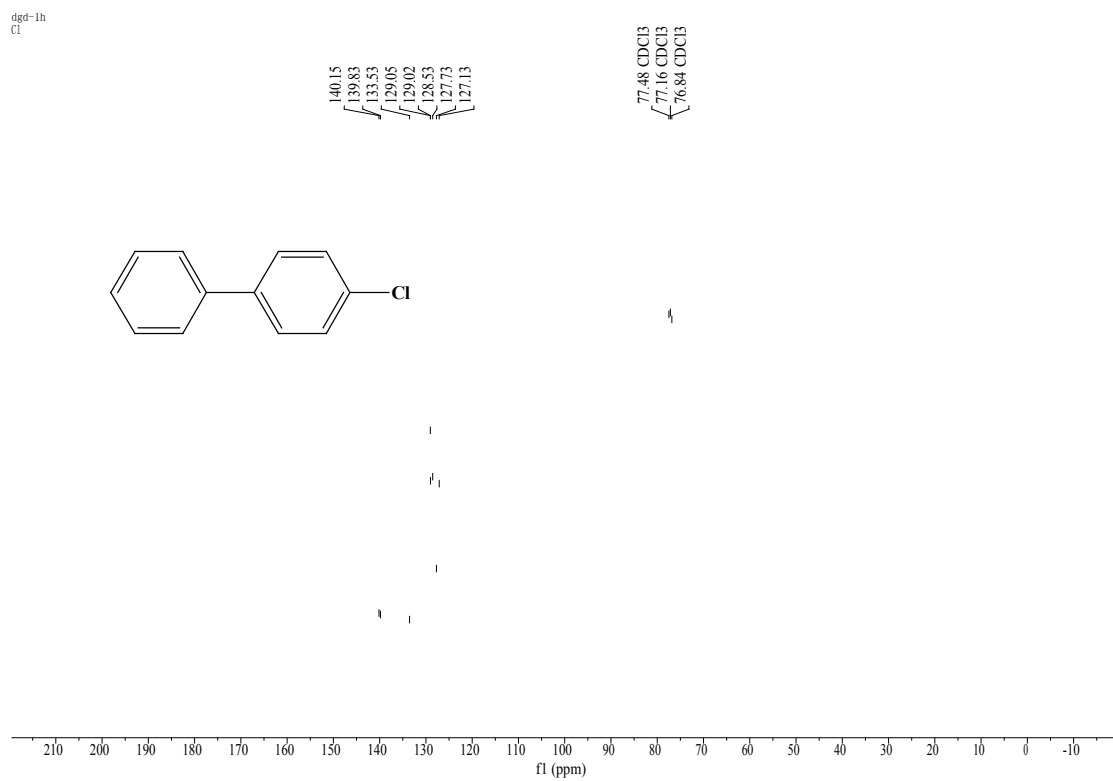

dgd-1h  
DGD-o-CH3

7.43  
7.42  
7.41  
7.41  
7.39  
7.35  
7.34  
7.33  
7.33  
7.31  
7.27  
7.26  
7.26  
7.25  
7.24  
7.24  
7.23  
7.23  
7.22

2.27

0.00

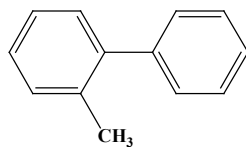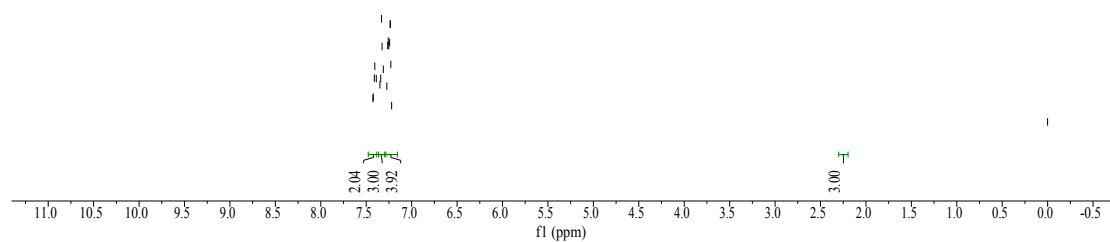

dgd-1h  
DGD-o-CH3

142.11  
142.08  
135.48  
130.44  
129.93  
129.33  
128.19  
127.38  
126.89  
125.89

20.61

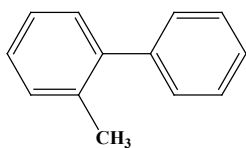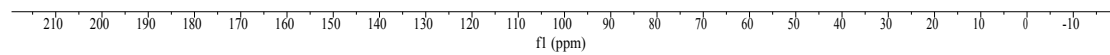



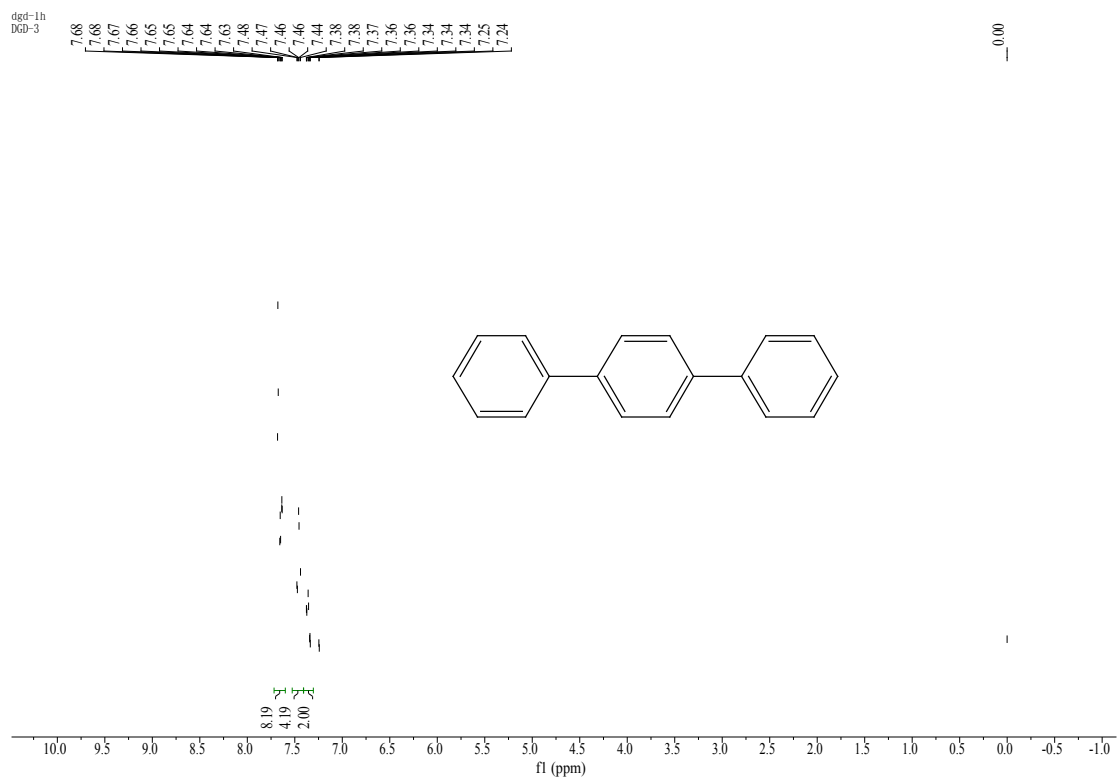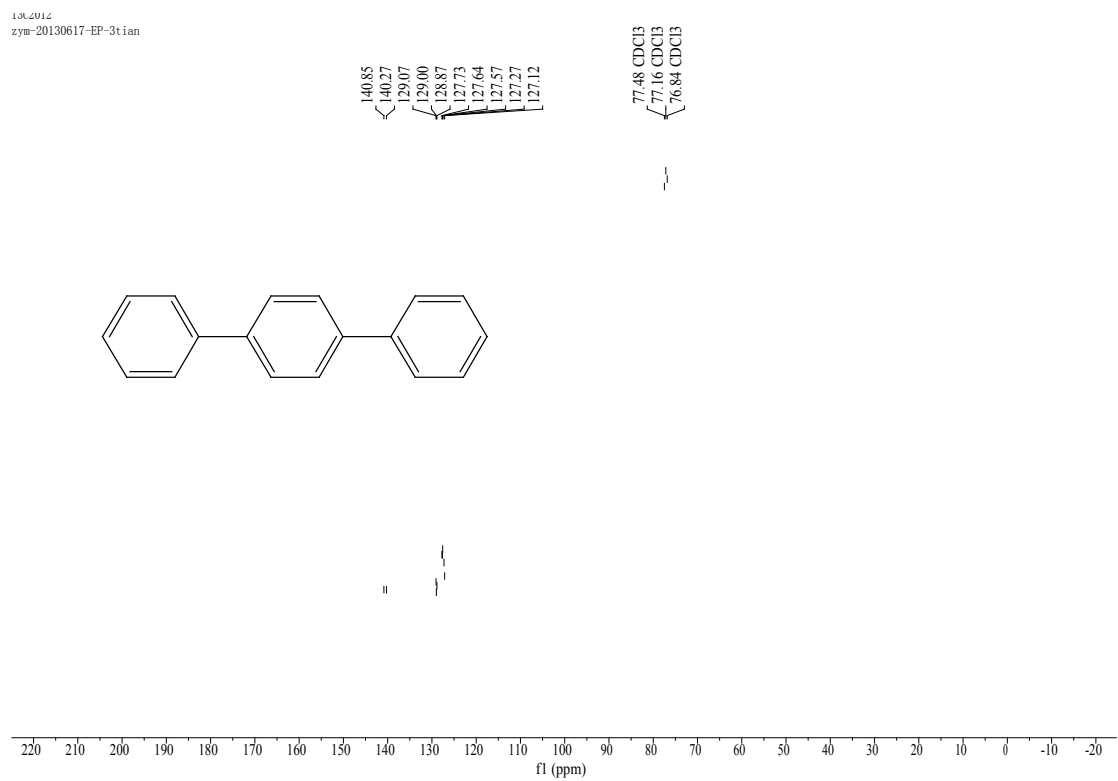

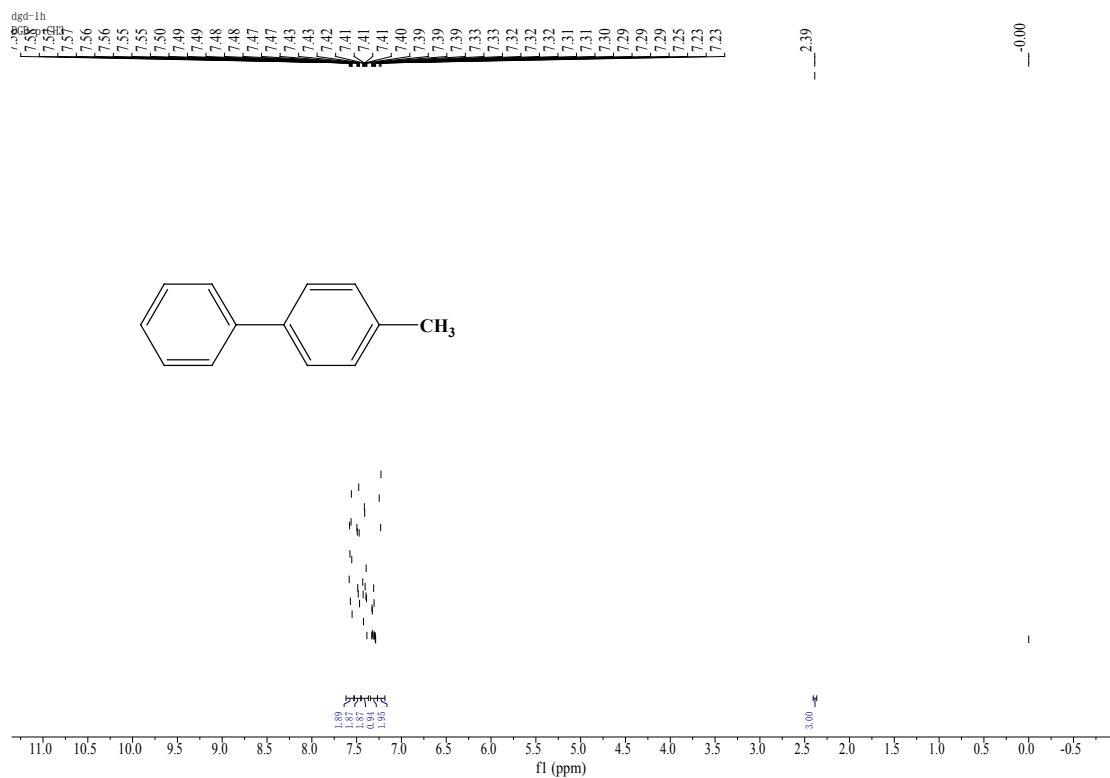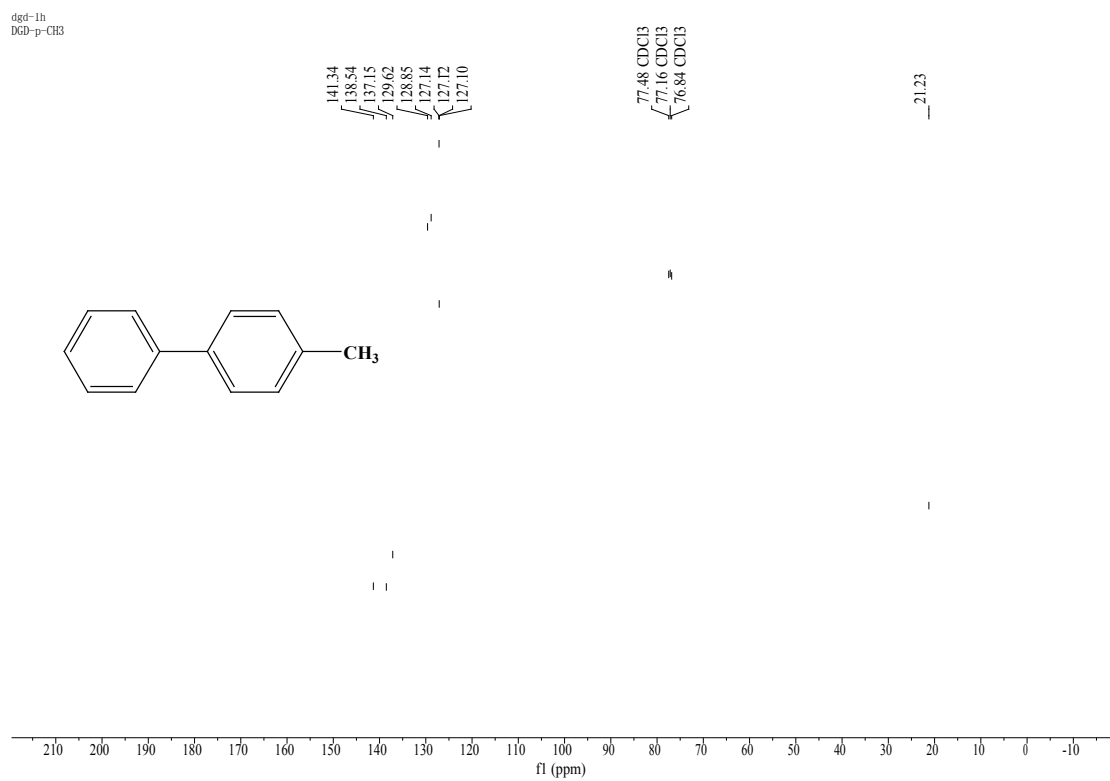

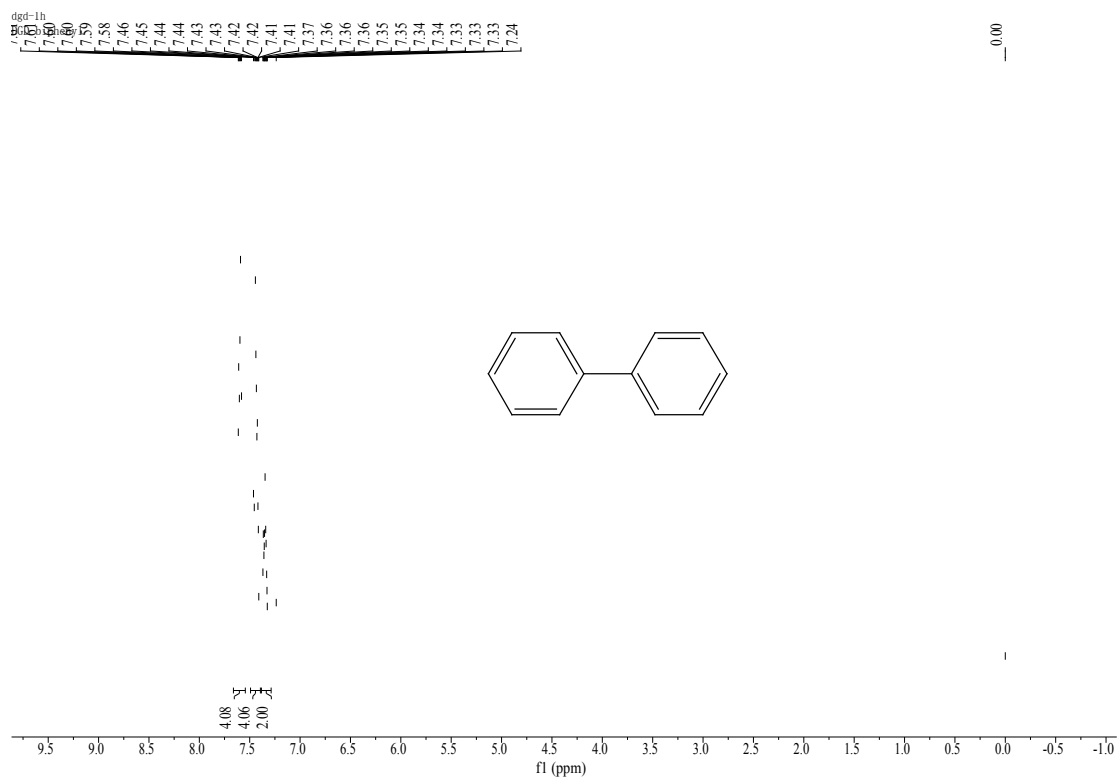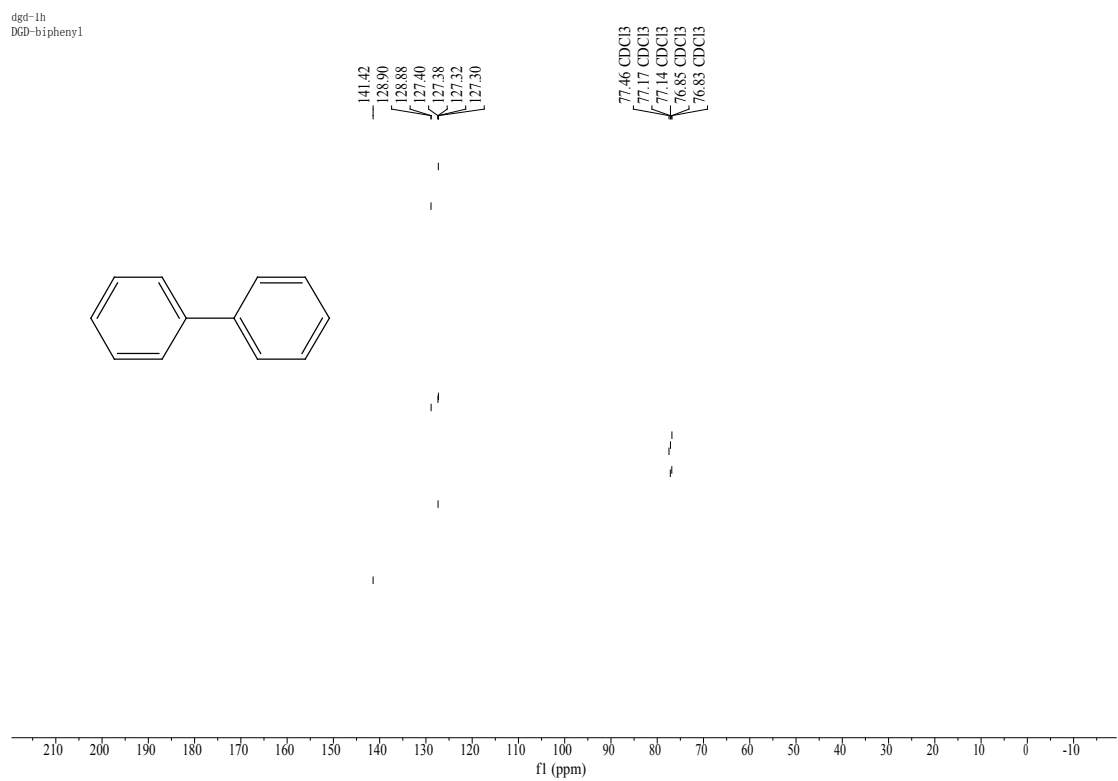

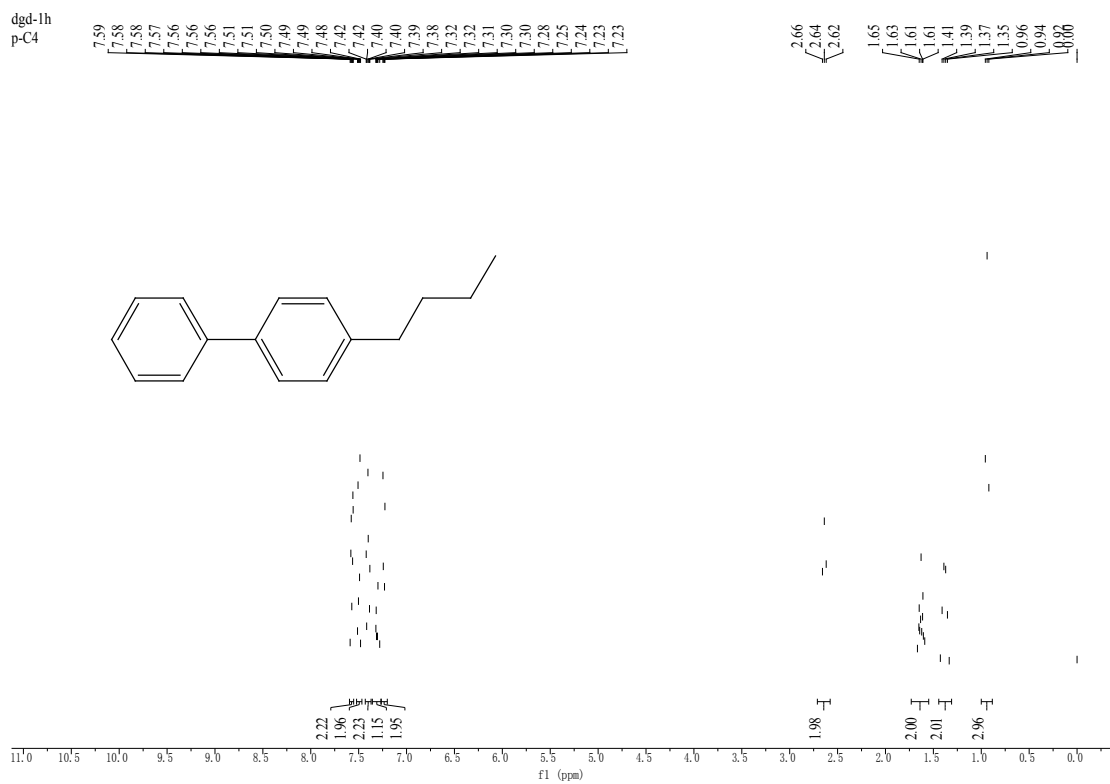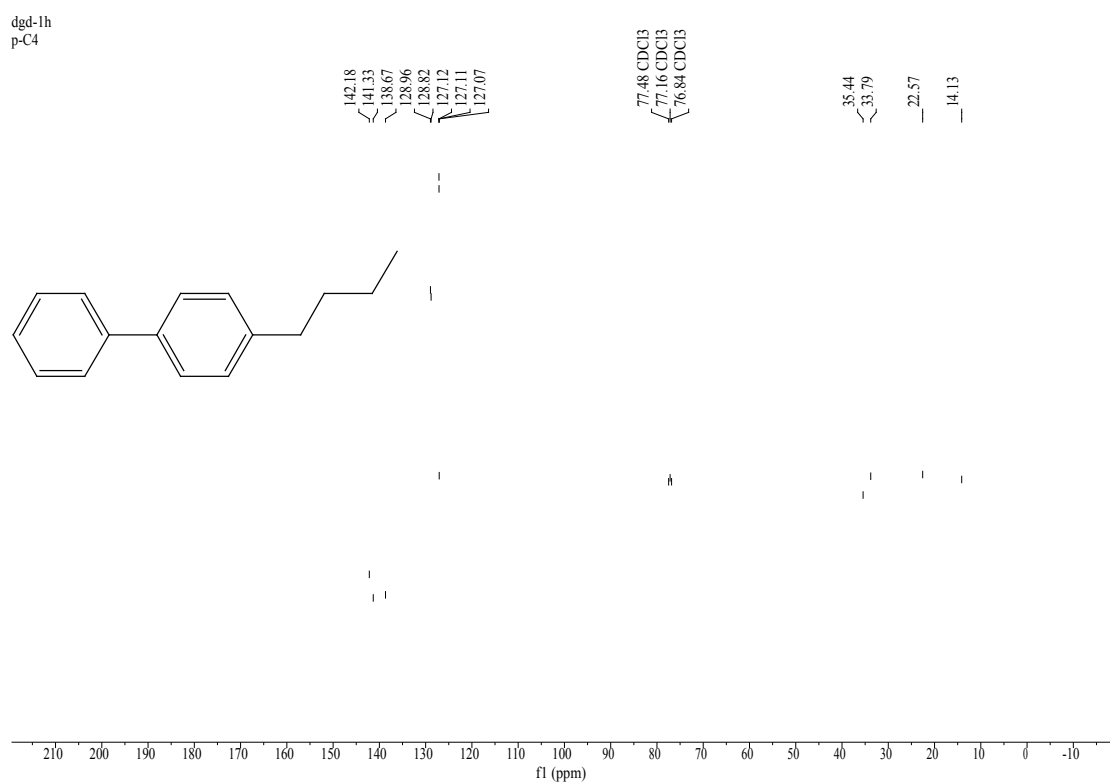

dgd-1h  
F-PhPh

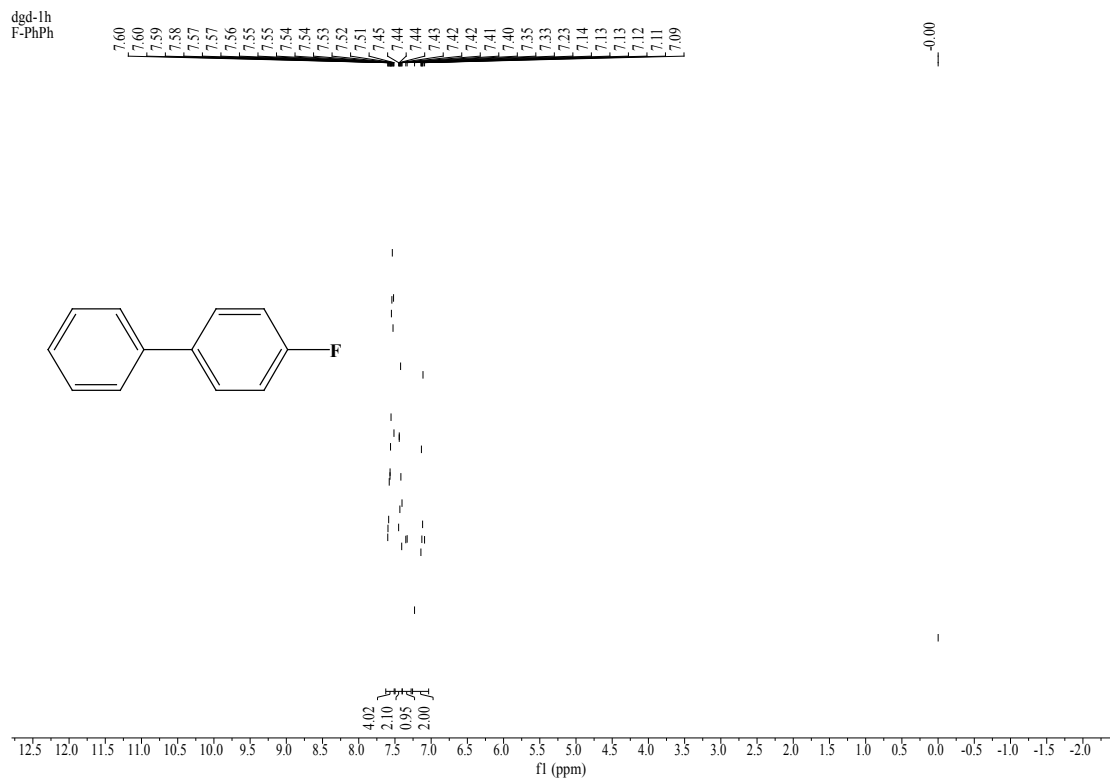

<sup>13</sup>C  
F-phph

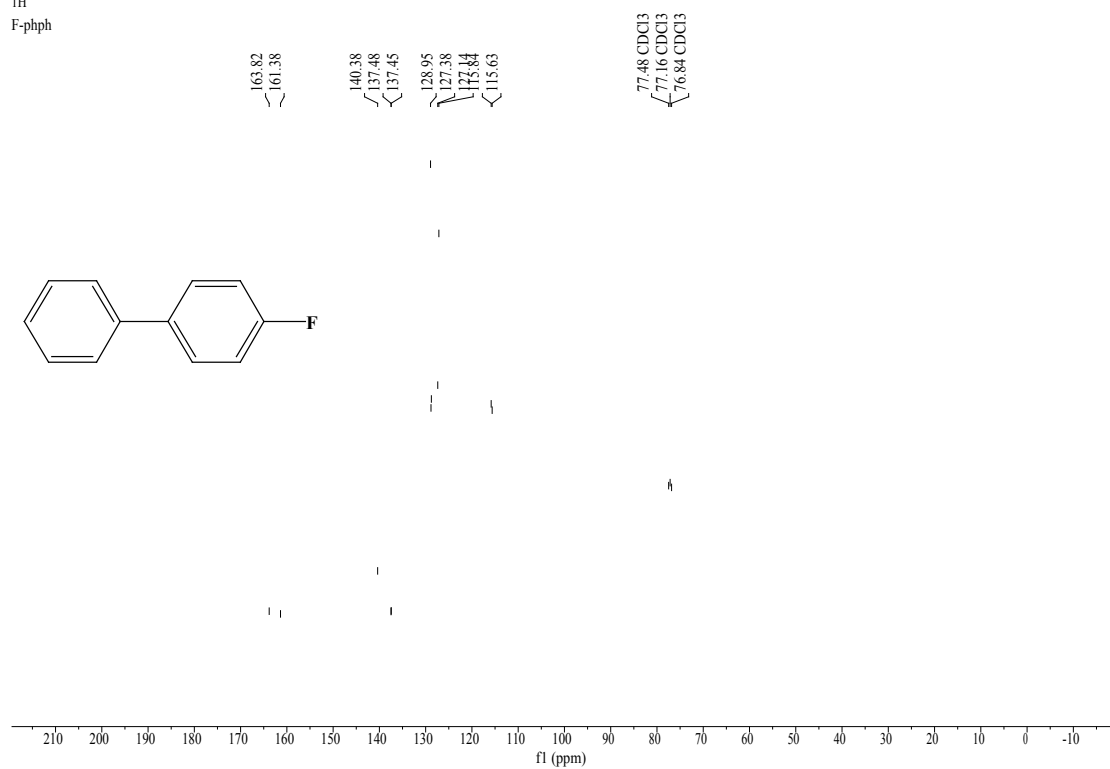

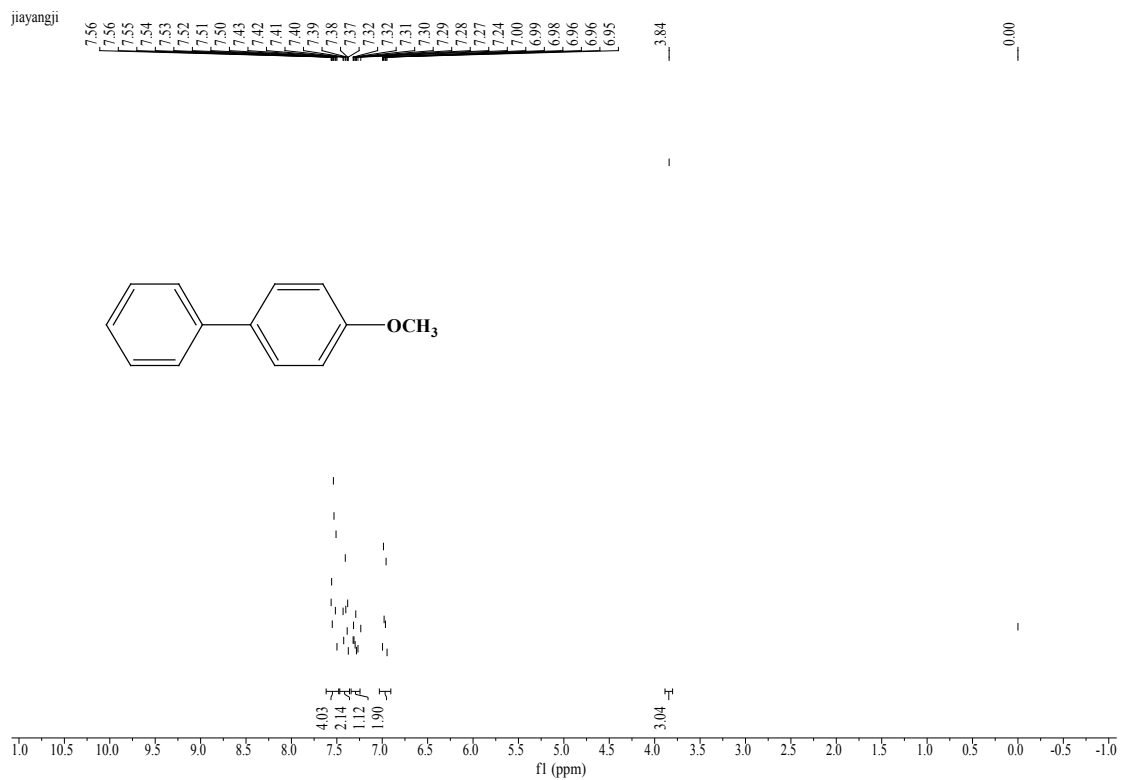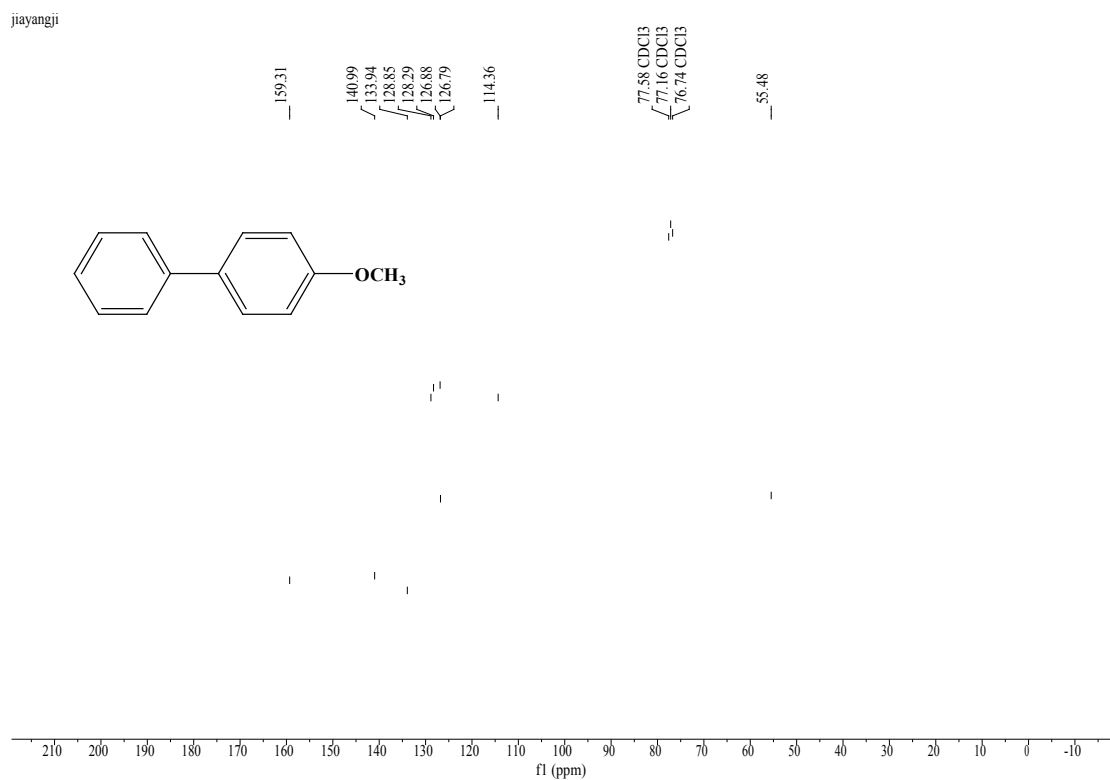

Supplement: c3gc41469h.pdf [file c3gc41469h.pdf]
